# Supplementary material for: Redox feedback regulation of ANAC089 signaling alters seed germination and stress response
Source: PubMed Central journal article supplement — Cell Rep. 2021 Jun 15;35(11):109263. doi: 10.1016/j.celrep.2021.109263 (PMC8220255; doi:10.1016/j.celrep.2021.109263), 2021-06-15
Supplement: mmc1.pdf [file mmc1.pdf]

**Supplemental information**

**Redox feedback regulation of ANAC089 signaling  
alters seed germination and stress response**

**Pablo Albertos, Kiyoshi Tatematsu, Isabel Mateos, Inmaculada Sánchez-Vicente, Alejandro Fernández-Arbaizar, Kazumi Nakabayashi, Eiji Nambara, Marta Godoy, José M. Franco, Roberto Solano, Davide Gerna, Thomas Roach, Wolfgang Stöggli, Ilse Kranner, Carlos Perea-Resa, Julio Salinas, and Oscar Lorenzo**

## **Supplemental information**

### **Redox Feed-Back Regulation of ANAC089 Signaling Alters Seed Germination and Stress Response**

Pablo Albertos, Kiyoshi Tatematsu, Isabel Mateos, Inmaculada Sánchez-Vicente, Alejandro Fernández-Arbaizar, Kazumi Nakabayashi, Eiji Nambara, Marta Godoy, José M. Franco, Roberto Solano, Davide Gerna, Thomas Roach, Wolfgang Stöggel, Ilse Kranner, Carlos Perea-Resa, Julio Salinas, and Oscar Lorenzo

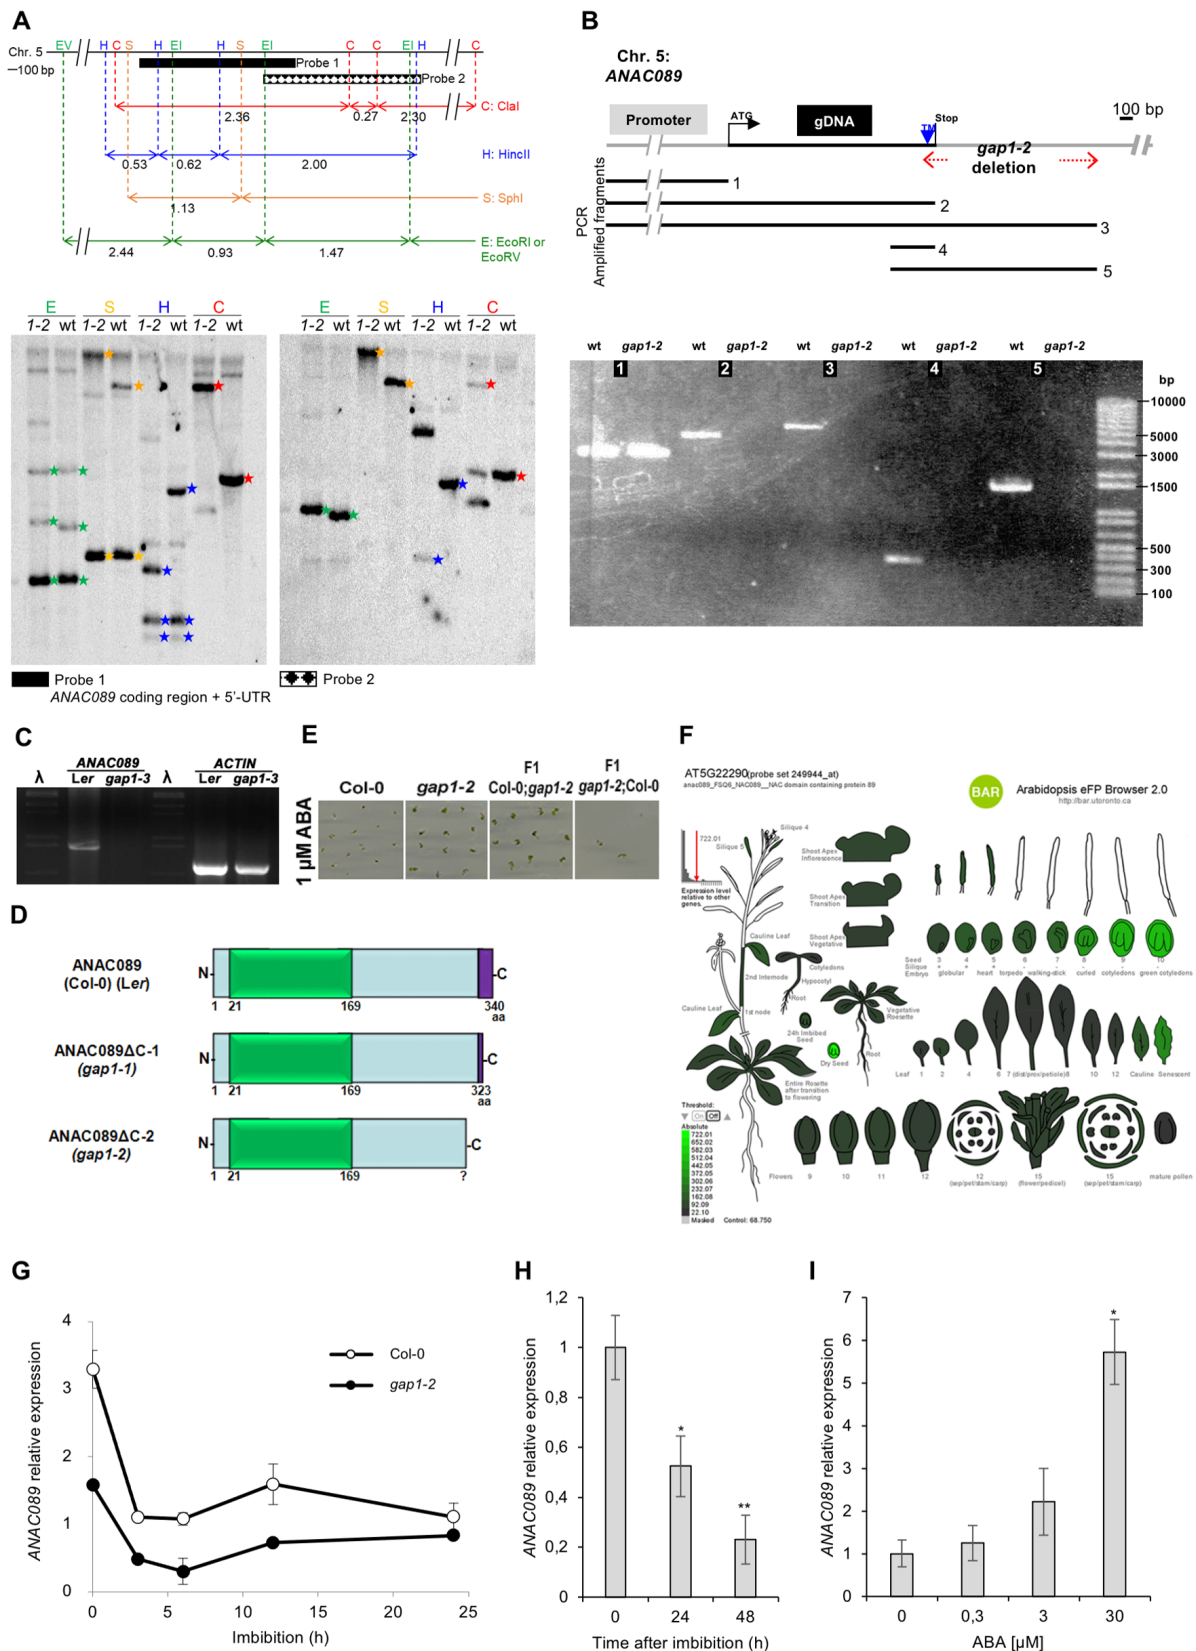

**Figure S1 (related to Figure 1). GAP1 encodes ANAC089 transcription factor expressed in seeds.**

(A) Southern blot analysis of *gap1-2* mutation was a ~700 bp deletion that includes the C-terminal region.

(B) Identification of the DNA deletion in *ANAC089* locus of *gap1-2* mutant in chromosome 5. Illustration of the *ANAC089* locus to show promoter, genomic DNA, transmembrane domain (TM)

and DNA regions that were amplified by PCR to study the position of the deletion. PCR amplified fragments from wild type (Col-0) and *gap1-2* corresponding to the illustration above. Fragments from 2 to 5 were not amplified, indicating that the DNA deletion in *gap1-2* mutant compromised the 3' end of *ANAC089* locus.

(C) *gap1-3* allele is a knockout mutant from the Martienssen laboratory at CSHL. Semi-Q RT-PCR analysis of the band corresponding to *ANAC089* detected in Col-0 and not detected in *gap1-3*.

(D) *ANAC089* protein scheme present in Col-0, *Ler*, *gap1-1* and *gap1-2* backgrounds, respectively. NAC domain (green) and transmembrane domain (TM, purple) are indicated.

(E) ABA-insensitive phenotype of *gap1-2* and F1 progeny of Col-0 and *gap1-2* genetic crosses indicating that *gap1-2* is a dominant mutation.

(F) *ANAC089* expression patterns during different developmental stages. Transcription levels of *ANAC089* (At5g22290) in different plant tissues, based on data obtained using the eFP Browser 2.0 (<http://bar.utoronto.ca>). *ANAC089* expression achieves highest levels in dry seeds.

(G) *ANAC089* expression levels in dry and imbibed seeds of Col-0 and *gap1-2* mutant. Q RT-PCR analysis of *ANAC089* relative transcript abundance in Col-0 and *gap1-2* mutant seeds after 0, 3, 6, 12 and 24 hours of imbibition. Bars represent standard deviation from triplicate Q RT-PCR experiments. The expression data was normalized by the abundance of 18S *rRNA* mRNA.

(H) *ANAC089* relative expression levels in dry seeds and during seed imbibition in wild type Col-0. *ANAC089* transcript levels are highly present in dry seeds and reduced during seed imbibition in water.

(I) ABA induces the expression of *ANAC089*. Seeds were imbibed during 48 h in 0 (control), 0.3, 3 and 30  $\mu$ M ABA and changes in the expression levels of *ANAC089* were analysed by RT-qPCR. In all the graphs the mean  $\pm$  SE (n=3) are represented. Asterisks indicate significant differences compared control vs treatments (*t*-test, \**P*<0.05, \*\**P*<0.01).

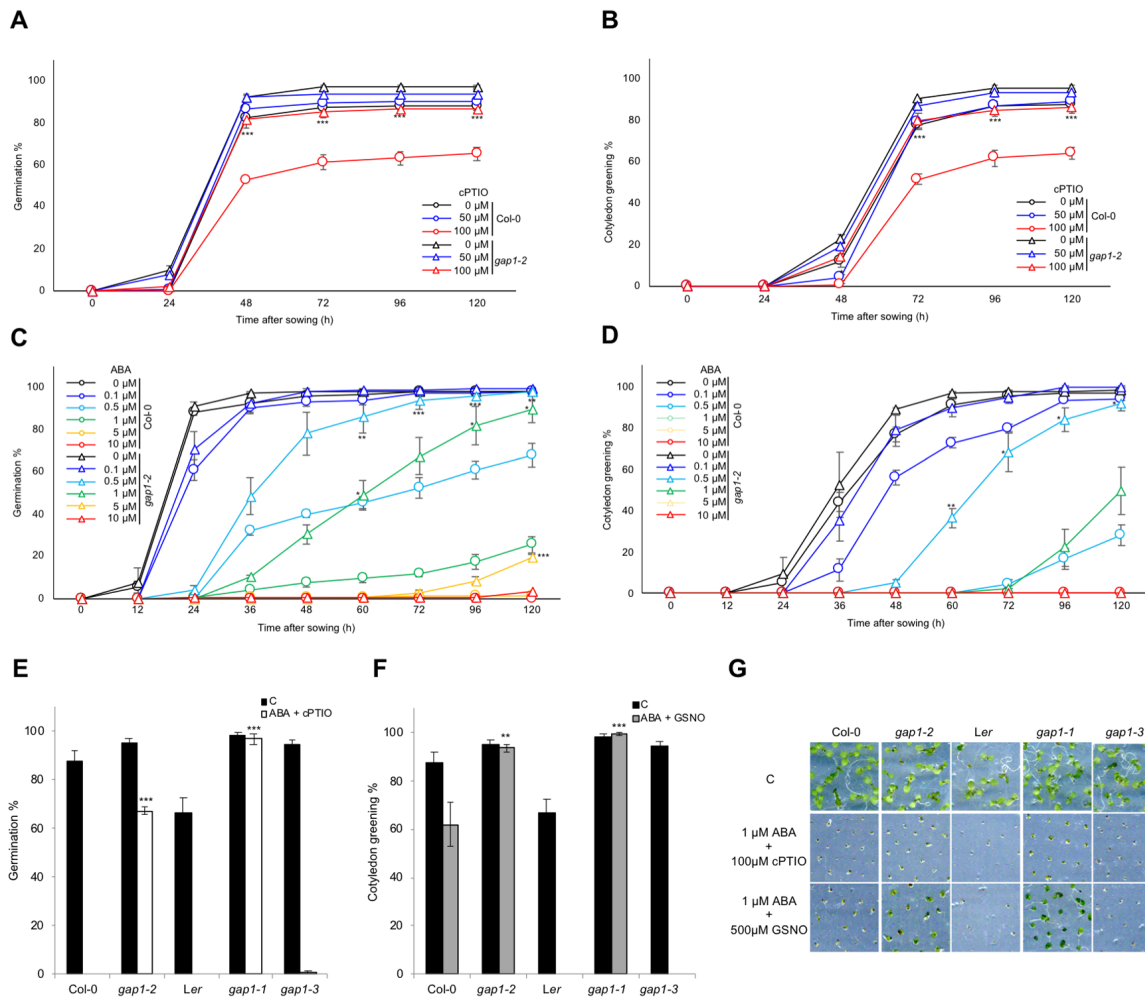

**Figure S2 (related to Figure 1). Dose-response and treatment combinations during seed germination assays.**

(A and B) Insensitivity of *gap1-2* mutants to cPTIO dose response concentrations compared to the wild type (Col-0) during seed germination and cotyledon greening. Wild type (Col-0) and *gap1-2* seeds were sown on control media (0μM) or media containing 50μM and 100μM cPTIO and seed germination (A) and cotyledon greening (B) are shown.

(C and D) Insensitivity of *gap1-2* mutants to ABA dose response concentrations compared to the wild type (Col-0) during seed germination and cotyledon greening. Wild type (Col-0) and *gap1-2* seeds were sown on control media (0μM) or media containing 0.1, 0.5, 1, 5 and 10μM ABA and seed germination (C) and cotyledon greening (D) are shown. In A-D graphs each value represents the average germination percentage of 50 to 100 seeds with error bars the SE of three replicates. Asterisks indicate significant differences compared wild-type vs mutant respectively for each concentration (*t*-test, \* $P < 0.05$ , \*\* $P < 0.01$ , \*\*\* $P < 0.001$ ).

(E) Insensitivity of *gap1-1* and *gap1-2* mutants to a combined treatment with ABA and the NO scavenger cPTIO compared to the wild type (Col-0, *Ler*) and *gap1-3* mutant during seed germination and seedling establishment. Seeds of the indicated genotypes were sown on control media (C) or media containing 1μM ABA plus 100μM cPTIO.

(F) Insensitivity of *gap1-1* and *gap1-2* mutants to a combined treatment with ABA and the NO donor GSNO compared to the wild type (Col-0, *Ler*) and *gap1-3* mutant during seed germination and seedling establishment. Seeds of the indicated genotypes were sown on control media (C) or media containing 1μM ABA plus 500μM GSNO. In E-F graphs the mean  $\pm$  SD are represented at 7 days after sowing. Each value represents the average germination and seedling establishment percentage of 50 to 100 seeds with three replicates. Asterisks indicate significant differences compared mutant vs wild type in the different treatments (*t*-test, \* $P < 0.05$ , \*\* $P < 0.01$ ).

(G) Representative picture of *gap1* mutants and wild types sowing the insensitivity of *gap1-1* and *gap1-2* to the combined treatments of ABA and cPTIO or GSNO.

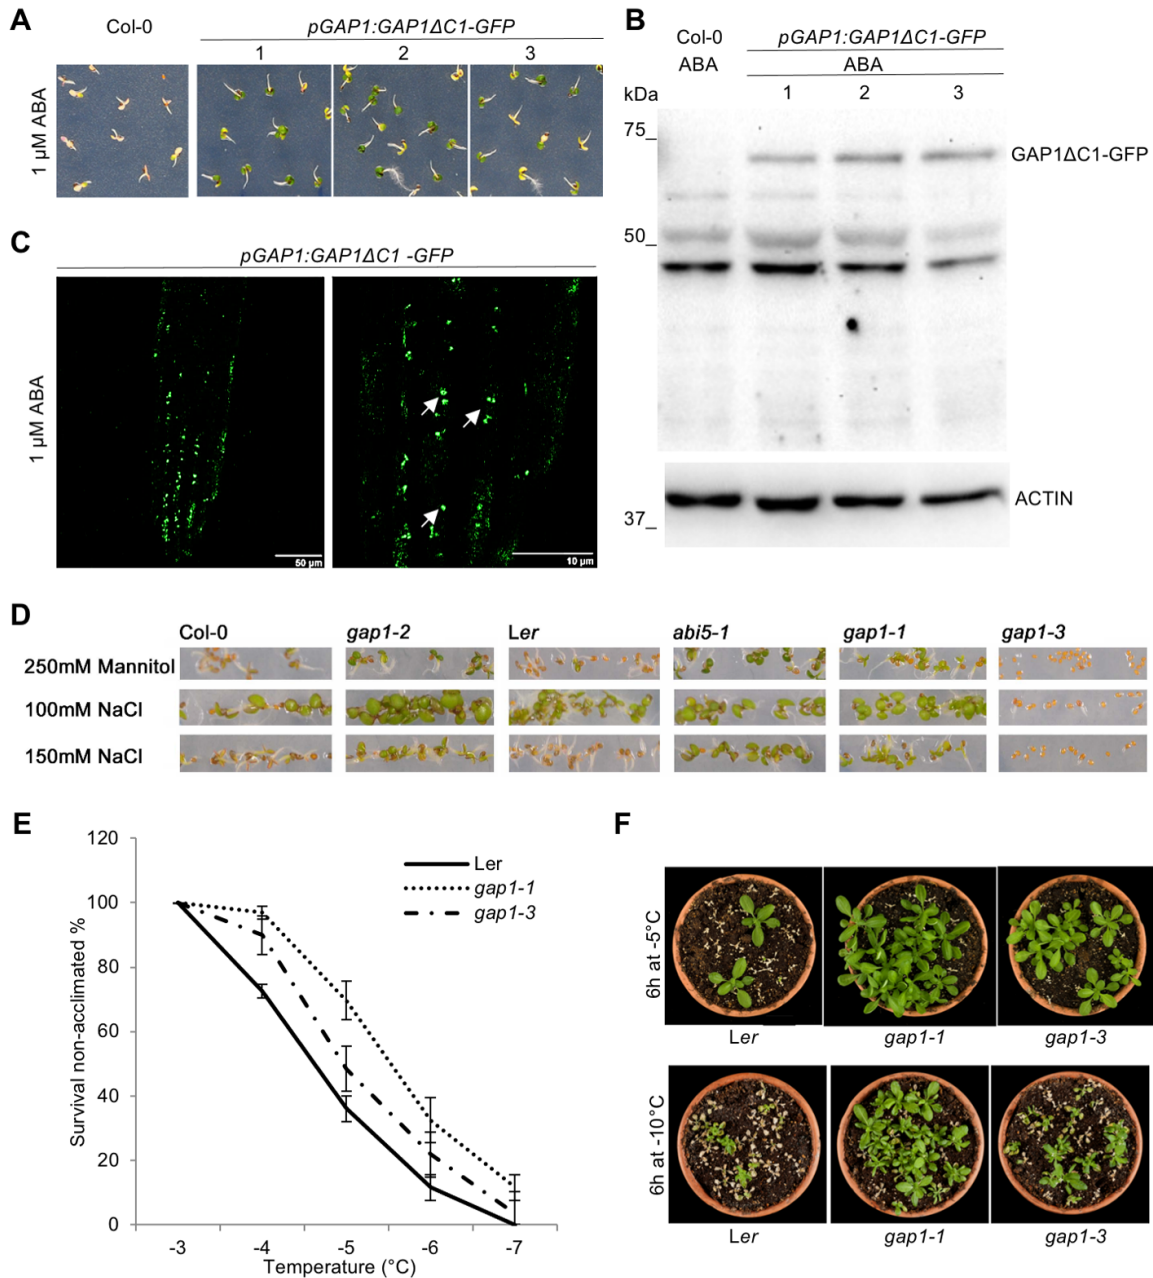

**Figure S3 (related to Figure 1). Gain-of-function phenotype of *pANAC089:ANAC089 $\Delta C$ -1-GFP* expression lines, abiotic stresses (NaCl and mannitol) and freezing tolerance assays of *gap1* mutants.**

(A) Three independent and homozygous *pANAC089:ANAC089 $\Delta C$ -1-GFP* lines were stratified for 3 days at 4°C and sown in MS media supplemented with 1  $\mu M$  ABA. Photographs of ABA-insensitive seedling establishment were taken 10 days after sowing.

(B) Corresponding ANAC089 $\Delta C$ -1-GFP protein levels in seedlings after 10 days in 1  $\mu M$  ABA. Actin protein levels were also determined as a loading control.

(C) Confocal microscopy of 10-day-old Arabidopsis roots of *pANAC089:ANAC089 $\Delta C$ -1-GFP*-expressor line in 1  $\mu M$  ABA. ANAC089 $\Delta C$ -1-GFP protein localized inside the cell nucleus in speckles.

(D) Stress germination assays in MS medium supplemented with either 250mM mannitol or 100 and 150mM NaCl.

(E) Freezing tolerance of two-week-old non-acclimated plants exposed to the indicated freezing temperatures for 6h. Survival percentages were evaluated after one week of recovering at 22°C under long-day conditions.

(F) Representative two-week-old non-acclimated (upper panel) and cold acclimated (7d, 4°C) (lower panel) Ler, *gap1-1* and *gap1-3* plants one week after being exposed 6h to  $-5^{\circ}C$  or  $-10^{\circ}C$ , respectively.



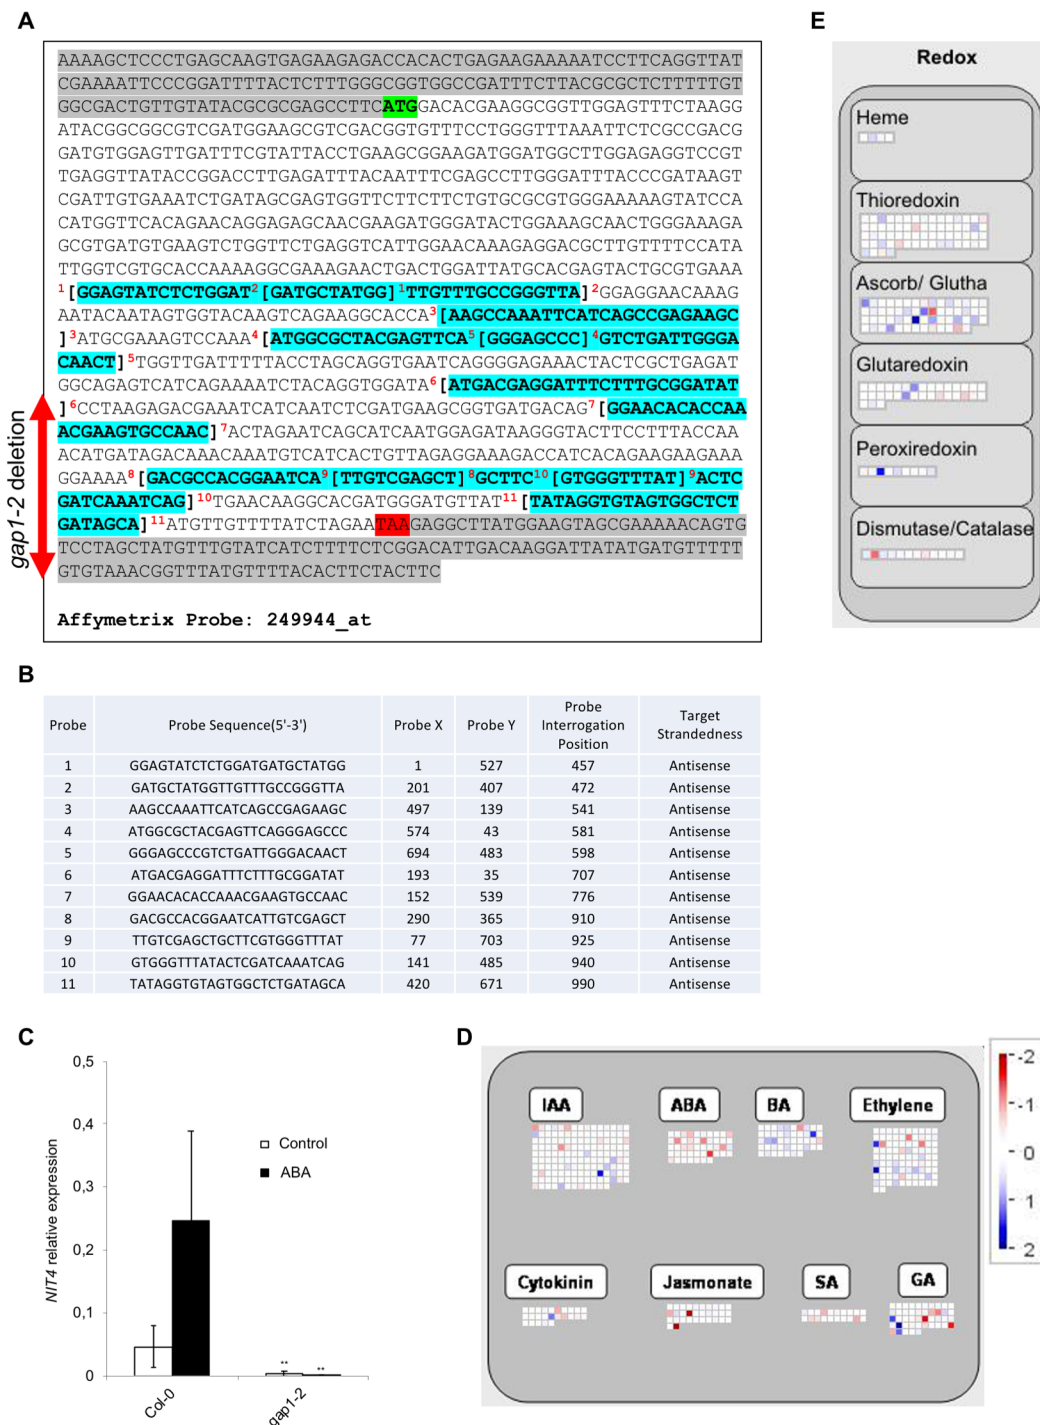

**Figure S4 (related to Figure 2). Probes of *ANAC089* gene in the Affymetrix GeneChip Arabidopsis ATH1 Genome Array and the deletion in *gap1-2* allele. Expression of representative genes.**

(A and B) *ANAC089* gene (Fold Change = -29.93) is the most strongly repressed gene in the microarray. To explain this, we search for the 11 probes of the *ANAC089* gene present in the Affymetrix GeneChip Arabidopsis ATH1 Genome Array and 6 of them (from 6 to 11) are included in the deletion present in *ANAC089* of *gap1-2* allele. In grey 5' and 3' UTRs, in green initial codon and in red stop codon.

(C) *NIT4* relative expression levels during seed imbibition and ABA treatment in wild type Col-0 and *gap1-2*. *NIT4* transcript levels are downregulated in *gap1-2* mutant under both conditions. Seeds were imbibed during 3 h in control and 5  $\mu$ M ABA and changes in the expression levels of *NIT4* were analysed by RT-qPCR. The mean  $\pm$  SE (n=3) is represented. Asterisks indicate significant differences compared control vs treatments (*t*-test, \*\**P*<0.01).

(D and E) Scheme representing the expression of genes involved in hormone (C) and redox metabolism (D), comparing expression levels in *gap1-2* versus Col-0 seeds. The results were analyzed using the MapMan software (Thimm et al., 2004; Usadel et al., 2005). Those genes that do not change are displayed in white, in red range are plotted induced genes and the repressed genes are represented in blue range.



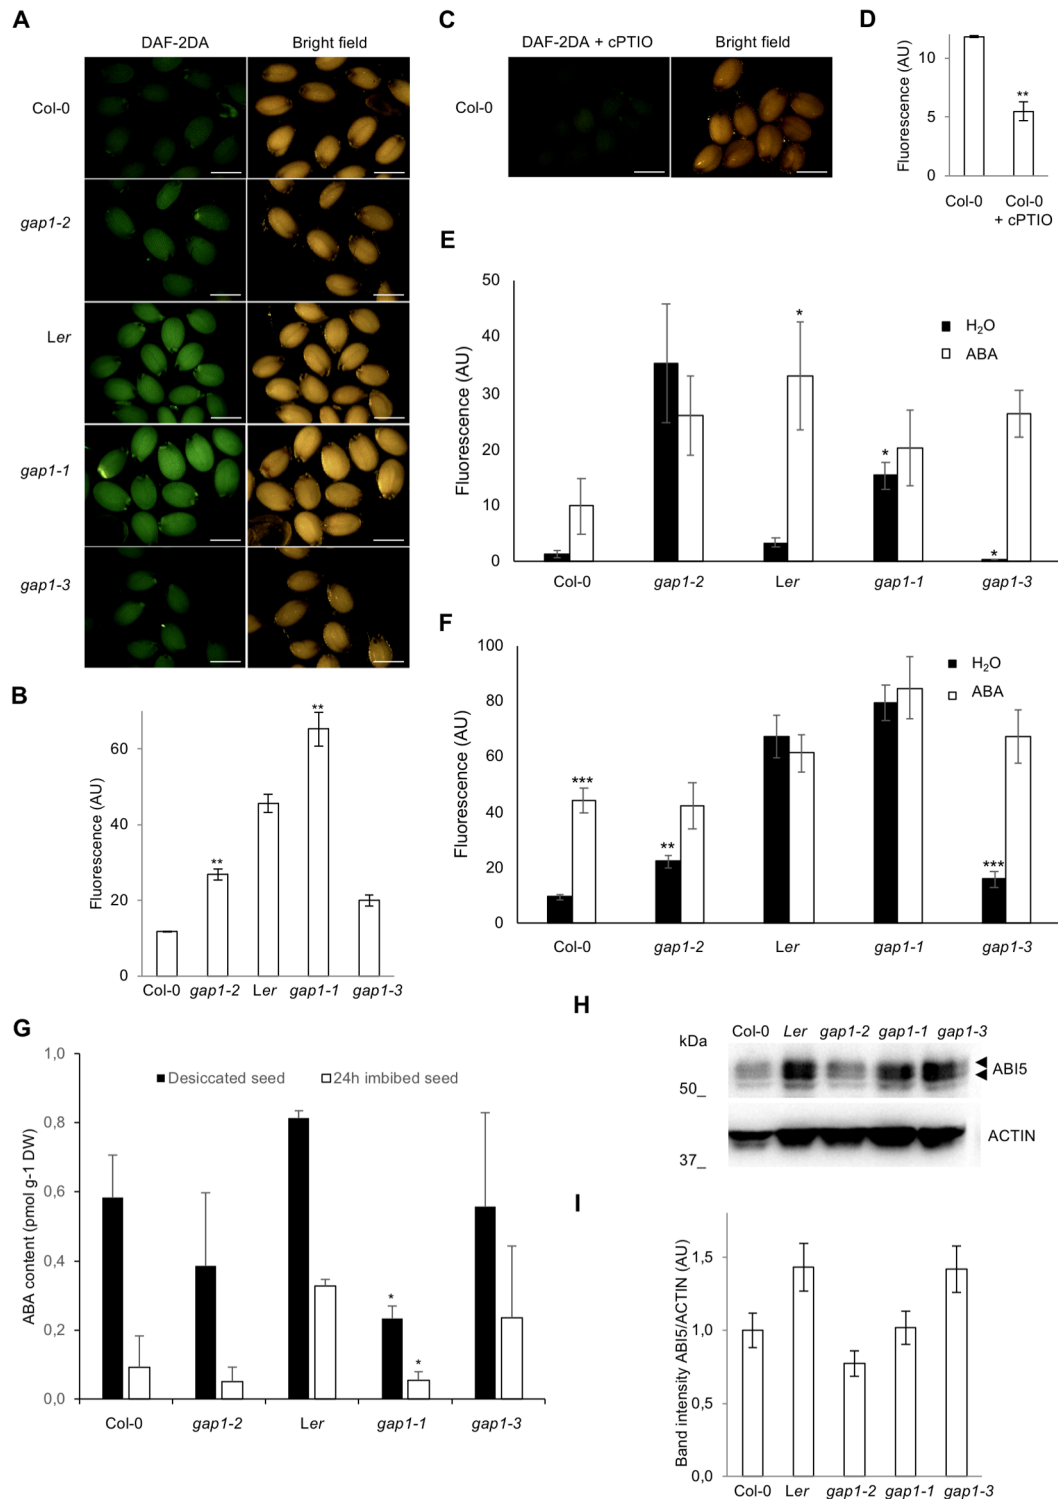

**Figure S5 (related to Figure 3). Increased endogenous NO levels in *gap1-1* and *gap1-2* imbibed seeds reduce ABI5 protein accumulation.**

(A) NO production detected by DAF-2DA in 24 hours imbibed seeds of the indicated genotypes, showing higher levels for *gap1-1* and *gap1-2* mutants compared with respective wild type. Scale bars 500  $\mu$ m.

(B) Quantitative data of NO-dependent DAF-2DA fluorescence seed images. Values represent the mean  $\pm$  SE ( $n=3$ ). Asterisks indicate statistically significant difference between a: *gap1-2* vs Col-0 ( $t$ -test,  $**P<0,01$ ); b: *gap1-1* vs Ler ( $t$ -test,  $**P<0,01$ ). AU, arbitrary units.

(C) Fluorescence of seeds treated with the NO scavenger cPTIO (1mM) imbibed for 24 hours and then subjected to DAF-2DA incubation. Scale bars 500  $\mu$ m.

- (D) Quantitative data of NO-dependent DAF-2DA fluorescence seed images. Values represent the mean  $\pm$  SE (n=3). Asterisks indicate statistically significant difference with Col-0 (*t*-test, \**P*<0,01). AU, arbitrary units.
- (E) Quantitative data of NO-dependent DAF-2DA fluorescence in 24-hour-imbibed embryos in water and 5 $\mu$ M ABA. Values represent the mean  $\pm$  SE (n=3). Asterisks indicate statistically significant difference between a: *Ler* H<sub>2</sub>O vs *Ler* ABA (*t*-test, \**P*<0,05); b: *gap1-1* vs *Ler* (*t*-test, \**P*<0,05).
- (F) Quantitative data of NO-dependent DAF-2DA fluorescence in 24-hour-imbibed seeds in water and 5 $\mu$ M ABA. Values represent the mean  $\pm$  SE (n=3). Asterisks indicate statistically significant difference between a: Col-0 H<sub>2</sub>O vs Col-0 ABA (*t*-test, \*\*\**P*<0,001); b: *gap1-2* vs Col-0 (*t*-test, \*\**P*<0,01); c: *gap1-3* vs *Ler* (*t*-test, \*\*\**P*<0,001). AU, arbitrary units.
- (G) Endogenous ABA levels in desiccated and 24-hour-imbibed seeds. Values represent means  $\pm$  SE (n=3). Asterisks indicate statistically significant differences with *Ler* (\**P*<0,05) according to a basic ANOVA test.
- (H) Immunoblot analysis of ABI5 protein levels in seed extracts of Col-0, *Ler*, *gap1-1*, *gap1-2* and *gap1-3* after 24 hours of imbibition. Actin protein levels are shown as a loading control.
- (I) Quantitative data of immunoblot analysis of ABI5 degradation in *gap1* mutant backgrounds. Values represent the mean  $\pm$  SE (n=3).

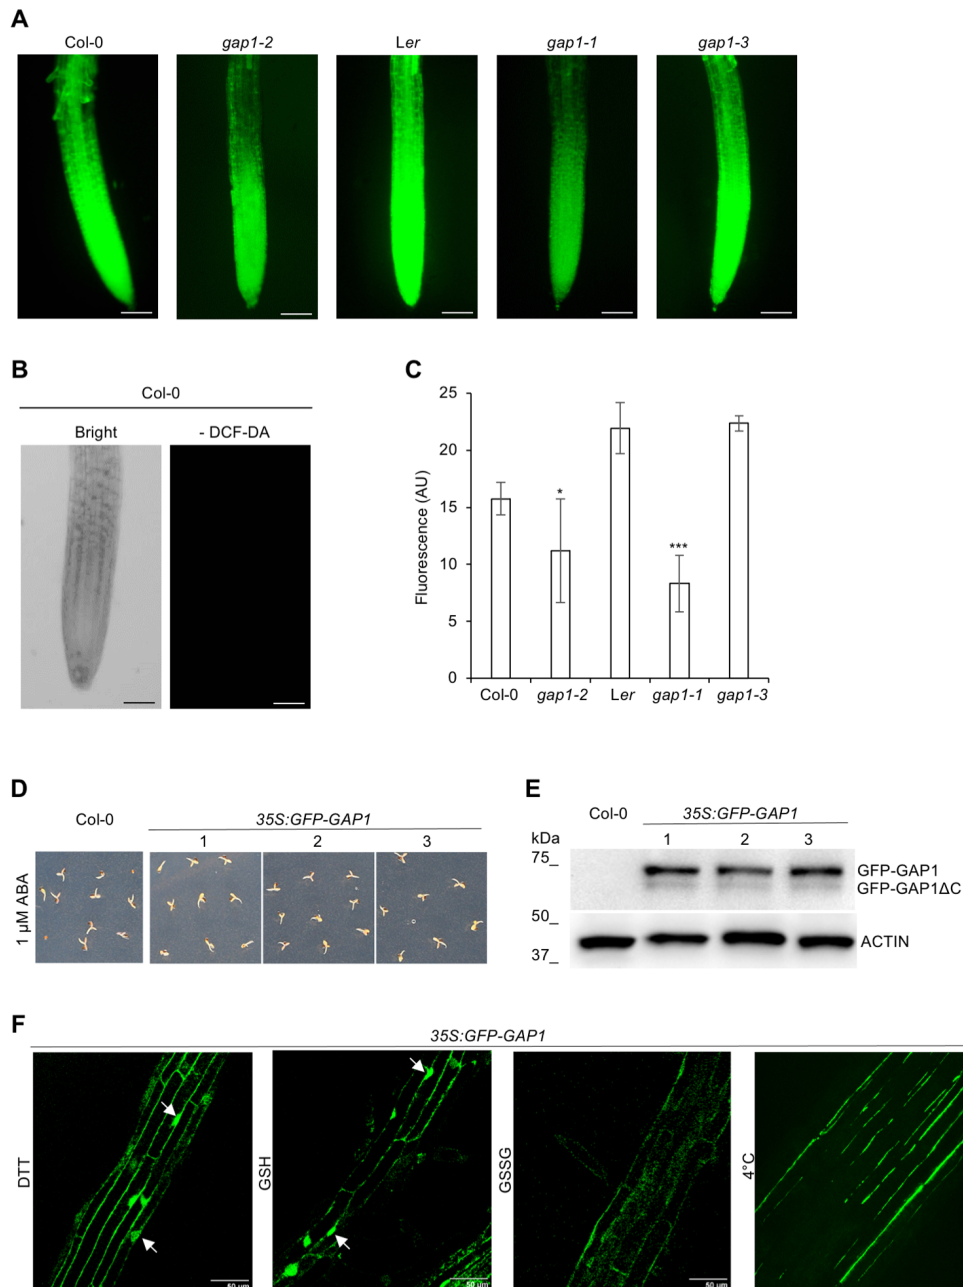

**Figure S6 (related to Figure 4). Decreased endogenous ROS levels in *gap1-1* and *gap1-2* mutants. Generation and molecular analysis of *35S:GFP-ANAC089* transgenic lines.**

(A) Endogenous ROS levels in *gap* mutants. Fluorescence corresponding to ROS accumulation in root tips of 6-day-old seedlings after incubation with DCF-DA. Scale bars 100  $\mu$ m.

(B) 6-day-old Col-0 root tip used as a negative control without ROS detecting probe to adjust fluorescence signal to zero. Scale bars 100  $\mu$ m.

(C) Quantitative data of ROS-dependent DCF-DA fluorescence root images. Values represent the mean of 10-12 roots for each genotype and error bars the SD of three replicates. Asterisks indicate statistically significant differences between a: *gap1-2* vs Col-0 (*t*-test, \**P*<0,05); b: *gap1-1* vs Ler (*t*-test, \*\*\**P*<0,001).

(D) Wild type ABA-sensitive seedling establishment in three independent and homozygous *35S:GFP-ANAC089* lines in Col-0 background. Photographs were taken 10 days after sowing.

(E) GFP-ANAC089 protein levels in *35S:GFP-ANAC089* seedlings after 10 days. Actin protein levels were also determined as a loading control.

(F) Confocal microscopy of 7-day-old Arabidopsis roots of *35S:GFP-ANAC089*-overexpressor lines after 4 hours of 1mM DTT, 1mM GSH, 1mM GSSG and 4°C treatments. Nuclear localization of GFP-ANAC089 protein after the corresponding treatments is indicated by arrows. Scale bars 50  $\mu$ m.

**Table S3 (related to STAR Methods). Primers used in this study.**Markers for fine mapping of *ANACO089*

| Markers   | Forward primer       | Reverse primer       | Enzyme        |
|-----------|----------------------|----------------------|---------------|
| MWD9      | CTTGTACAGTAGCTGCATTG | GTAAAACCGTGGGAGAAAC  | <i>EcoR V</i> |
| MWD9-25.3 | ACACGGGTTTAGGTCACA   | ACCTCTCTAGACAAAAGCCA | <i>Acc I</i>  |
| At5g22250 | TATGATTCCATGACTAGA   | TATAACTAAACCTTG CAG  | <i>Hinf I</i> |

Primers for production of *pANAC089:ANAC089ΔC-1* and *ANAC089* cDNA

| Name            | Forward primer                | Reverse primer        |
|-----------------|-------------------------------|-----------------------|
| <i>Compl</i>    | <u>CACCATCTCTTGAAAAATCTCC</u> | TTCTAGATAAAACAACATTGC |
| <i>pANAC089</i> | <u>CACCATCTCTTGAAAAATCTCC</u> | GAAGGCTCGCGGTATACAAC  |
| <i>cDNA</i>     | ATGGACACGAAGGCGGTTGG          | AAGAGCTCGAGCATACTG    |

Primers for Q RT-PCR

| Gene              | Forward primer             | Reverse primer          |
|-------------------|----------------------------|-------------------------|
| <i>Q2-ANAC089</i> | CACTGAGAAGAAAAATCCTTCAGGTT | AAAAAGAGCGCGTAAGAAATCG  |
| <i>NIT4</i>       | AGTACCATGCTTCTGCCATTG      | CCATTAACGCTAATCGTTCCA   |
| <i>18S rRNA</i>   | CAGATACCGTCCTAGTCTCAACCA   | CAGCGGAGTCCTATAAGCAACAT |
